# Supplementary material for: GROα Is Highly Expressed in Adenocarcinoma of the Colon and Down-Regulates Fibulin-1
Source: Oxford University Press journal article supplement (doi:10.1158/1078-0432.ccr-06-0736), 2006-10-15
Supplement: 10780432ccr060736-sup-supplementary_table_1.xls [file 10780432ccr060736-sup-supplementary_table_1.xls]

## Sheet: Sheet1
SIMG-1/SIMG-C Expression	p-value	Descriptions
32	2e-05	gb:BC005047.1 /DEF=Homo sapiens, clone MGC:12852, mRNA, complete cds. /FEA=mRNA /PROD=Unknown (protein for MGC:12852) /DB_XREF=gi:13477170 /UG=Hs.180383 dual specificity phosphatase 6 /FL=gb:BC003562.1 gb:BC003143.1 gb:BC005047.1 gb:AB013382.1 gb:NM_001946.1
25.9921	2e-05	Consensus includes gb:Z95331 /DEF=Human DNA sequence from clone CTA-941F9 on chromosome 22q13 Contains the 3 end of the FBLN1 gene for Fibulin 1 isoforms B, C and D, the first exon of the gene for a novel protein (the ortholog of mouse brain protein E46), ESTs, STSs, GSSs and two... /FEA=mRNA_1 /DB_XREF=gi:6572282 /UG=Hs.79732 fibulin 1 /FL=gb:U01244.1 gb:NM_006486.1
16	0.000273	Consensus includes gb:AI378788 /FEA=EST /DB_XREF=gi:4188641 /DB_XREF=est:tc67b04.x1 /CLONE=IMAGE:2069647 /UG=Hs.153445 Human mRNA for unknown product, partial cds
14.9285	2e-05	gb:NM_006486.1 /DEF=Homo sapiens fibulin 1 (FBLN1), transcript variant D, mRNA. /FEA=mRNA /GEN=FBLN1 /PROD=fibulin 1 isoform D /DB_XREF=gi:5922008 /UG=Hs.79732 fibulin 1 /FL=gb:U01244.1 gb:NM_006486.1
13.9288	7.8e-05	Consensus includes gb:AK026674.1 /DEF=Homo sapiens cDNA: FLJ23021 fis, clone LNG01014, highly similar to HUMSEF21B Human SEF2-1B protein (SEF2-1B) mRNA. /FEA=mRNA /DB_XREF=gi:10439577 /UG=Hs.326198 transcription factor 4
12.1257	0.000346	gb:NM_001996.1 /DEF=Homo sapiens fibulin 1 (FBLN1), transcript variant C, mRNA. /FEA=mRNA /GEN=FBLN1 /PROD=fibulin 1 isoform C precursor /DB_XREF=gi:4503662 /UG=Hs.79732 fibulin 1 /FL=gb:NM_001996.1
10.5561	2e-05	gb:NM_000963.1 /DEF=Homo sapiens prostaglandin-endoperoxide synthase 2 (prostaglandin GH synthase and cyclooxygenase) (PTGS2), mRNA. /FEA=mRNA /GEN=PTGS2 /PROD=prostaglandin-endoperoxide synthase 2(prostaglandin GH synthase and cyclooxygenase) /DB_XREF=gi:4506264 /UG=Hs.196384 prostaglandin-endoperoxide synthase 2 (prostaglandin GH synthase and cyclooxygenase) /FL=gb:M90100.1 gb:L15326.1 gb:NM_00…
9.84916	2.3e-05	gb:AF145712.1 /DEF=Homo sapiens soluble neuropilin-1 mRNA, complete cds. /FEA=mRNA /PROD=soluble neuropilin-1 /DB_XREF=gi:7271464 /UG=Hs.69285 neuropilin 1 /FL=gb:AF145712.1
8	2e-05	gb:NM_005544.1 /DEF=Homo sapiens insulin receptor substrate 1 (IRS1), mRNA. /FEA=mRNA /GEN=IRS1 /PROD=insulin receptor substrate 1 /DB_XREF=gi:5031804 /UG=Hs.96063 insulin receptor substrate 1 /FL=gb:NM_005544.1
6.9644	2e-05	gb:BC003143.1 /DEF=Homo sapiens, dual specificity phosphatase 6, clone MGC:3789, mRNA, complete cds. /FEA=mRNA /PROD=dual specificity phosphatase 6 /DB_XREF=gi:13111942 /UG=Hs.180383 dual specificity phosphatase 6 /FL=gb:BC003562.1 gb:BC003143.1 gb:BC005047.1 gb:AB013382.1 gb:NM_001946.1
6.9644	2e-05	gb:NM_012242.1 /DEF=Homo sapiens dickkopf (Xenopus laevis) homolog 1 (DKK1), mRNA. /FEA=mRNA /GEN=DKK1 /PROD=dickkopf (Xenopus laevis) homolog 1 /DB_XREF=gi:7110718 /UG=Hs.40499 dickkopf (Xenopus laevis) homolog 1 /FL=gb:AF127563.1 gb:AF177394.1 gb:NM_012242.1
6.49802	2e-05	gb:NM_001552.1 /DEF=Homo sapiens insulin-like growth factor-binding protein 4 (IGFBP4), mRNA. /FEA=mRNA /GEN=IGFBP4 /PROD=insulin-like growth factor-binding protein 4 /DB_XREF=gi:10835020 /UG=Hs.1516 insulin-like growth factor-binding protein 4 /FL=gb:NM_001552.1 gb:M62403.1
6.49802	2e-05	Consensus includes gb:BE620457 /FEA=EST /DB_XREF=gi:9891395 /DB_XREF=est:601483690F1 /CLONE=IMAGE:3886055 /UG=Hs.69285 neuropilin 1 /FL=gb:AF018956.1 gb:AF016050.1 gb:NM_003873.1
6.06287	2e-05	gb:BC003143.1 /DEF=Homo sapiens, dual specificity phosphatase 6, clone MGC:3789, mRNA, complete cds. /FEA=mRNA /PROD=dual specificity phosphatase 6 /DB_XREF=gi:13111942 /UG=Hs.180383 dual specificity phosphatase 6 /FL=gb:BC003562.1 gb:BC003143.1 gb:BC005047.1 gb:AB013382.1 gb:NM_001946.1
5.65685	2.3e-05	gb:NM_002526.1 /DEF=Homo sapiens 5 nucleotidase (CD73) (NT5), mRNA. /FEA=mRNA /GEN=NT5 /PROD=5 nucleotidase /DB_XREF=gi:4505466 /UG=Hs.153952 5 nucleotidase (CD73) /FL=gb:NM_002526.1
4.92458	0.000438	gb:U31110.1 /DEF=Human alternatively spliced trp-1 protein and unspliced trp-1 protein (trp-1) mRNA, complete cds. /FEA=mRNA /GEN=trp-1; trp-1 /PROD=alternatively spliced trp-1 protein; unspliced trp-1 protein /DB_XREF=gi:1072042 /FL=gb:U31110.1
4.92458	2e-05	gb:M19154.1 /DEF=Human transforming growth factor-beta-2 mRNA, complete cds. /FEA=mRNA /PROD=transforming growth factor beta 2 /DB_XREF=gi:339549 /UG=Hs.169300 transforming growth factor, beta 2 /FL=gb:M19154.1
4.59479	2e-05	Consensus includes gb:AA126728 /FEA=EST /DB_XREF=gi:1686292 /DB_XREF=est:zk95d07.s1 /CLONE=IMAGE:490573 /UG=Hs.83733 intercellular adhesion molecule 2
4.59479	3.5e-05	Consensus includes gb:AF052117.1 /DEF=Homo sapiens clone 23809 mRNA sequence. /FEA=mRNA /DB_XREF=gi:3360424 /UG=Hs.6932 Homo sapiens clone 23809 mRNA sequence
4.28709	2e-05	gb:NM_001657.1 /DEF=Homo sapiens amphiregulin (schwannoma-derived growth factor) (AREG), mRNA. /FEA=mRNA /GEN=AREG /PROD=amphiregulin (schwannoma-derived growth factor) /DB_XREF=gi:4502198 /UG=Hs.270833 amphiregulin (schwannoma-derived growth factor) /FL=gb:M30704.1 gb:NM_001657.1
4.28709	2e-05	gb:M68874.1 /DEF=Homo sapiens phosphatidylcholine 2-acylhydrolase (cPLA2) mRNA, complete cds. /FEA=mRNA /GEN=cPLA2 /PROD=phosphatidylcholine 2-acylhydrolase /DB_XREF=gi:190003 /UG=Hs.211587 phospholipase A2, group IVA (cytosolic, calcium-dependent) /FL=gb:M68874.1 gb:M72393.1
4.28709	2e-05	gb:NM_002010.1 /DEF=Homo sapiens fibroblast growth factor 9 (glia-activating factor) (FGF9), mRNA. /FEA=mRNA /GEN=FGF9 /PROD=fibroblast growth factor 9 (glia-activatingfactor) /DB_XREF=gi:4503706 /UG=Hs.111 fibroblast growth factor 9 (glia-activating factor) /FL=gb:D14838.1 gb:NM_002010.1
4.28709	2e-05	gb:AF200715.1 /DEF=Homo sapiens PTB domain adaptor protein CED-6 mRNA, complete cds. /FEA=mRNA /PROD=PTB domain adaptor protein CED-6 /DB_XREF=gi:6409467 /UG=Hs.107056 CED-6 protein /FL=gb:AF200715.1 gb:AF191771.1 gb:NM_016315.1
4	0.000189	Consensus includes gb:W72516 /FEA=EST /DB_XREF=gi:1382173 /DB_XREF=est:zd64g05.s1 /CLONE=IMAGE:345464 /UG=Hs.74566 dihydropyrimidinase-like 3 /FL=gb:D78014.1 gb:NM_001387.1
